1 **Pleistocene climate change and the formation of regional species pools**

2 Joaquín Calatayud<sup>1,2,3</sup>, Miguel Ángel Rodríguez<sup>1</sup>, Rafael Molina-Vengas<sup>4</sup>, María Leo<sup>5</sup>,  
3 José Luís Hórreo<sup>6</sup> and Joaquín Hortal<sup>2</sup>.

4

5 1 Departamento de Ciencias de la Vida, Universidad de Alcalá, Edificio de Ciencias, Ctra. Madrid-  
6 Barcelona km. 33,6, 28871 Alcalá de Henares, Madrid, Spain.

7 2 Departamento de Biogeografía y Cambio Global, Museo Nacional de Ciencias Naturales  
8 (MNCN-CSIC), C/José Gutiérrez Abascal 2, 28006 Madrid, Spain.

9 3. Integrated Science Lab, Department of Physics, Umeå University, Naturvetarhuset, byggnad  
10 G, NA plan 3, IceLab Umeå universitet, 901 87 Umeå, Sweden.

11 4. Institute of Plant Sciences, University of Bern, Altenbergrain 21, Bern 3013, Switzerland

12 5. Departamento de Biodiversidad y Conservación. Real Jardín Botánico de Madrid (CSIC).  
13 28014 Madrid, España

14 6. Departamento de Biodiversidad y Biología Evolutiva, Museo Nacional de Ciencias Naturales  
15 (MNCN-CSIC), C/José Gutiérrez Abascal 2, 28006 Madrid, Spain.

16 **STRAPLINE: Pleistocene effects on species pools**

17 **Abstract**

18 Despite the description of bioregions dates back from the origin of biogeography, the  
19 processes originating their associated species pools have been seldom studied. Ancient  
20 historical events are thought to play a fundamental role in configuring bioregions, but  
21 the effects of more recent events on these regional biotas are largely unknown. We use a  
22 network approach to identify regional and sub-regional faunas of European *Carabus*  
23 beetles, and analyse the effects of dispersal barriers, niche similarities and phylogenetic  
24 history on their configuration. We identify a transition zone matching the limit of the ice  
25 sheets at Last Glacial Maximum. While southern species pools are mostly separated by  
26 dispersal barriers, in the north species are mainly sorted by their environmental niches.  
27 Strikingly, most phylogenetic structuration of *Carabus* faunas occurred since the  
28 beginning of the Pleistocene. Our results show how extreme recent historical events –  
29 such as Pleistocene climate cooling, rather than just deep-time evolutionary processes,  
30 can profoundly modify the composition and structure of geographic species pools.

31

32 **Keywords:** Pleistocene glaciations, regional community, species pool, regionalization,  
33 occurrence networks, dispersal, niche tracking, *Carabus* ground beetles, Europe.

## 34 **Introduction**

35 Naturalists have long been captivated by the geographic distribution of world biotas.  
36 Rooted in the seminal ideas by Alexandre von Humbolt, this fascination has promoted a  
37 long-term research agenda aiming to delineate biogeographic regions according to their  
38 integrating faunas and floras (e.g. Wallace 1876, Holt et al. 2013, Rueda et al. 2013).  
39 Besides this, the large-scale eco-evolutionary processes that shape regional biotas are  
40 known to influence ecological and evolutionary dynamics at finer scales (Ricklefs 2008,  
41 2015). For instance, regional species pools can modulate local diversity patterns  
42 (Ricklefs 2011, Medina et al. 2014, Ricklefs and He 2016), the structure and  
43 functioning of ecosystems (Naeslund and Norberg 2006), or co-evolutionary processes  
44 (Calatayud et al. 2016a). However, despite their fundamental importance, the processes  
45 that have configured regional biotas have been seldom studied (and particularly the  
46 historical ones), and most explanations on their origin and dynamics remain largely  
47 narrative (Crisp et al. 2011).

48         Perhaps the earliest speculations about the formation of regional species pools  
49 took place during the flourishing of bioregionalizations in the mid-19th century  
50 (reviewed by Ebach 2015). During that time, and beyond referring to geophysical  
51 factors (climate, soils, and physical barriers), some authors already started to emphasize  
52 historical influences as key elements determining the configuration of plant and animal  
53 regions. For instance, when Wallace (1876) proposed his ground-breaking  
54 zoogeographic regions, he argued that while the distribution of ancient lineages such as  
55 genera and families would likely reflect major geological and climatic changes spanning  
56 the early and mid-Cenozoic, species distributions would be more influenced by recent  
57 events such as Pleistocene glaciations (see Rueda et al. 2013). These recent events could  
58 have fostered many additions and subtractions of species to regional faunas through  
59 dispersal and diversification processes. Indeed, increasing evidence suggests that  
60 Pleistocene glacial-interglacial dynamics may have driven population extinctions (e.g.  
61 Barnes et al. 2002), allopatric speciation in glacial refugia (e.g. Johnson et al. 2004) and  
62 post-glacial recolonization events (e.g. Hewitt 1999; Theissinger et al. 2013). Besides  
63 shaping phylogeographic patterns (Avice et al. 1998; Ursenbacher et al. 2006; Sommer  
64 and Nadachowski 2006; Provan and Bennett 2008), all these processes are likely  
65 underpinning diversity patterns for many taxa, particularly in the Holarctic (e.g.  
66 Svenning and Skov 2007; Hortal et al. 2011; Calatayud et al. 2016b). However, whether

67 the signature of Pleistocene glaciations scales up to the configuration of regional biotas  
68 remains largely unknown.

69 Historical contingencies should act over the intricate interplay between  
70 ecological (i.e. environmental tolerances and dispersal) and evolutionary (i.e.  
71 diversification and adaptation to new habitats) processes underpinning the composition  
72 and structure of regional species pools. On the one hand, niche-based processes may  
73 determine the composition of regional species pools (Mittelbach and Schemske 2015),  
74 mainly throughout their effects on species distribution ranges (Soberon 2007, Hortal et  
75 al. 2010, 2012). These processes integrate responses to abiotic conditions along  
76 geographical gradients and to local and regional biotic environments (Colwell et al.  
77 2009), which may ultimately lead to the appearance of distinct regional communities in  
78 areas of contrasted environmental conditions (Ricklefs 2015). Although species with  
79 similar environmental tolerances/preferences can coexist in regions of similar climate,  
80 their dispersal may be constrained by geographical barriers, which may lead to  
81 divergent species pools under similar environmental conditions. Finally, evolutionary  
82 processes also constrain all these mechanisms. For instance, environmental-driven  
83 regions may be expected if occupancy of new areas is constrained by niche  
84 conservatism (Hortal et al. 2011), which should also lead to species pools integrated of  
85 evolutionary related species (i.e. niche conservatism generating phylogenetically  
86 clustered species pools, Fig.1a). This, however, can be in turn filtered by  
87 biogeographical processes (Gouveia et al. 2014). As such, diversification of lineages  
88 within regions separated by strong dispersal barriers (e.g. mountain ranges) may also  
89 lead to phylogenetically clustered pools of locally adapted species (i.e. geographically  
90 driven niche conservatism; Fig.1a; Warren et al. 2014, Calatayud et al. 2016a).

91 Historical contingencies may contribute to the configuration of regional pools by  
92 modifying the balance between these processes. For example, differential diversification  
93 rates may be the predominant driver of regional species pools during climatically stable  
94 periods (Cardillo 2011). Yet, regions with a greater influence of climatic fluctuations  
95 such as Pleistocene glaciations may harbour pools of species mostly shaped by the joint  
96 effects of current climate and post-glacial colonization dynamics (Svenning et al. 2015),  
97 thus eroding the signature of geographically-structured diversification processes.

98 In this study we aim to disentangle the relative importance of the processes  
99 that may contribute to the formation of regional species pools, using European *Carabus*  
100 (Coleoptera: Carabidae) as a model lineage. *Carabus* is a species-rich ground beetle

101 genus of great popularity due to the beautiful jewel-like appearance of some species  
102 (Turin et al. 2003). In general, *Carabus* species are flightless nocturnal predators of  
103 snails, earthworms and caterpillars. They hold hydrophilic adaptations and are typically  
104 associated to deciduous forests (Deuve et al. 2012). Previous evidence suggests that the  
105 richness of species from this genus in Europe is determined to a large extent by both  
106 current environmental conditions (i.e. climate and habitat) and glacial-interglacial  
107 dynamics (Calatayud et al. 2016b). This makes European *Carabus* an ideal case study to  
108 evaluate the joint effects of evolutionary, ecological and historical contingency  
109 processes as drivers of regional species pools.

110           Specifically, we use data on the distribution and evolutionary relationships of  
111 *Carabus* species, along with network and phylogenetic analyses, to evaluate six  
112 hypotheses: First, given the presumed low dispersal capacity of the species from this  
113 genus (Turin et al. 2003), we hypothesize that (H1) European *Carabus* species pools are  
114 mainly shaped by the main orographic barriers of the continent, but also, that (H2)  
115 glacial-interglacial dynamics have led to strong differentiation between northern and  
116 southern regional species pools. If this differentiation is true, northern European  
117 *Carabus* faunas will be comprised of species that colonized newly vacant habitats after  
118 the withdrawal of the ice sheet, and hence (H3) their regional distribution will be mostly  
119 determined by current climate. In contrast, (H4) southern faunas will be mainly shaped  
120 by the joint influence of diversification events and dispersal limitations, due to the  
121 combined effect of higher climatic stability (e.g. climatic refugia) and a more complex  
122 orography (Alps, Pyrenees, Carpathians). Therefore, (H5) species forming northern  
123 regional pools will exhibit comparatively lower levels of regional endemism, whereas  
124 those forming southern regional pools will show comparatively higher levels of regional  
125 affinity. Finally, according to Wallace (1876), the advance and retreat of the ice sheets  
126 during the Pleistocene should have determined the spatial distribution of lineages,  
127 eroding the effects of the former configuration of the distribution of the main *Carabus*  
128 lineages. Therefore, (H6) we expect a temporal signal coincident with the Pleistocene in  
129 the phylogenetic structure of *Carabus* faunas, and no effect of deep-time events on the  
130 current geographical distribution of these lineages.

131

## 132 **Material and methods**

### 133 **Rationale and structure of the analyses**

134 Exploring the determinants of regional faunas requires jointly analysing ecological,  
135 evolutionary and historical factors. We did so through three consecutive steps (Fig.1b).  
136 First, we identified distinct regional species pools within Europe by using a network  
137 community detection algorithm. From this analysis we derived a species pairwise  
138 similarity matrix of occurrence into different modules, each one representing different  
139 regions. Second, we assessed the relative importance of environmental, spatial and  
140 evolutionary determinants of such similarity. To do so, we constructed four pairwise  
141 matrices to describe ecological, topographical and evolutionary relationships among  
142 species; namely, *i*) a matrix of climatic niche similarity, *ii*) a matrix of habitat similarity,  
143 *iii*) a matrix of spatial connectivity among distributional ranges, and *iv*) a phylogenetic  
144 distance matrix. Then, we used generalized partial matrix regressions to model the  
145 similarity in species occurrences as a function of these four matrices (Fig.1b). We used  
146 this workflow to explore the factors involved in the configuration of *Carabus* faunas  
147 both at regional (i.e. through analysing *Carabus* species co-occurrence across regions)  
148 and sub-regional scale (i.e. focusing on co-occurrence patterns within sub-regions).  
149 Finally, we also applied ancestral range estimation analysis in order to identify the time  
150 period from which ancestral areas are estimated with less uncertainty. By doing so, we  
151 aimed to detect important historical periods contributing to the regional organization of  
152 *Carabus* lineages.

153         The interpretation of the joint and independent effects of explanatory matrices  
154 can shed light on the different processes configuring regional faunas (see Fig.1a). Thus,  
155 if niche similarities (i.e. represented by the climatic and habitat similarity matrices) and  
156 phylogenetic distances altogether explained the regional co-occurrence of species, then  
157 this could be interpreted as indicative of constrained niche evolution (or a tendency to  
158 resemble ancestral niches) in shaping regional faunas (Fig.1a.i). However, if spatial  
159 connectivity also accounted for part of this co-occurrence, this would indicate that this  
160 niche conservatism pattern can be caused by geographical constraints (Fig.1a.ii). Further,  
161 the effects of niche similarities and spatial connectivity alone (i.e. without phylogenetic  
162 signal) can be most likely the consequence of a convergence of climatic niches due to  
163 geographic isolation (Fig.1a.iii), whereas the effects of connectivity and phylogeny  
164 would be indicative of a primacy of intra-regional speciation driven by geographical  
165 barriers. Niche similarities alone would point to an unconstrained niche evolution  
166 shaping regional faunas, while phylogeny alone would indicate a primacy of  
167 geographically unconstrained intra-regional speciation events. Finally, either a *cul-de-*

168 *sac* effect (i.e. the accumulation of species in past climatic refugia) or a primacy of  
169 vicariant speciation events could lead to the existence of independent effects of  
170 connectivity and regional co-occurrence (Fig.1a.iv).

171

## 172 **Identification of regional species pools**

173 We took advantage of community detection analysis —borrowed from network  
174 theory— to identify *Carabus* regional species pools in Europe. We first generated a  
175 bipartite network where species and grid cells constitute two disjoint sets of nodes that  
176 are connected according to the presence of species in grid cells (e.g. Calatayud et al.  
177 2016a). The species presence data comes from expert-based range maps of all *Carabus*  
178 species inhabiting Europe (n = 131, Turin et al. 2003) overlaid into a 100-km equal-area  
179 grid based on the LAEA pan-European grid system (available at  
180 <http://dataservice.eea.europa.eu><https://inspire.ec.europa.eu/>, see Calatayud et al. 2016b  
181 for details). Then, we conducted a modularity analysis using the index proposed by  
182 Barber (2007) and the Louvain algorithm (Blondel et al. 2008) as implemented in the  
183 Matlab function “Gen Louvain”, (available at <http://netwiki.amath.unc.edu>; Mucha et al.  
184 2010). This analysis is intended to find groups of nodes (i.e. species and grid cells) that  
185 are more densely connected. Hence, in our case, the analysis identified groups of grid  
186 cells, each group sharing *Carabus* species mainly distributed within its cells (i.e. regions  
187 and their associated faunas). The Louvain algorithm was run 100 times, and the network  
188 partition showing highest modularity value was retained. This optimal solution was  
189 used to conduct all subsequent analyses, although all the solutions were qualitatively  
190 similar. We evaluated the statistical significance of the modules by comparing their  
191 associated modularity value to a null distribution of values (n = 100) where the original  
192 presence-absence matrix was randomized using the independent swap algorithm (a  
193 fixed-fixed null model implemented in the R package “picante”, Kembel et al. 2010).  
194 Finally, to detect potential sub-modules (i.e. sub-regions) nested within modules (i.e.  
195 sub-regional species pools within regional species pools), we derived a new bipartite  
196 network from each of the previously identified modules, and applied the procedure  
197 described above in each case.

198 It is important to note that despite species and grid cells were assigned to just  
199 one module, they could also occur in other modules with different degrees of affinity.  
200 For example, despite most species in a grid cell will belong to the same module the cell  
201 does, this cell could also hold species that are primarily associated to other modules.



202 Similarly, although a species will mostly be present in cells assigned to its module, it  
203 may also occur in cells from other modules. Thus, we calculated the degree of module  
204 affinity for each node (i.e. species and grid cells) as its number of links with nodes of its  
205 module divided by its total number links (see Guimera and Amaral's 2005 inter-  
206 modular participation index for a similar metric). Thus, higher module affinities would  
207 correspond to species mainly distributed within its module (highly endemic species), as  
208 well as to cells pertaining to well-defined regions; whereas lower module affinities  
209 would reflect widespread species and cells located in transition zones.

210

### 211 **Assessing the determinants of regional species pools**

212 In order to disentangle the determinants of the current configuration of *Carabus* faunas  
213 in Europe, we first generated a species-per-module matrix, where each entry of the  
214 matrix represents the percentage of the distributional range of a certain species that lies  
215 in a given module. Then, we derived a co-occurrence pairwise similarity matrix from  
216 the former matrix using the Schoener's index (Schoener 1970). This metric quantifies  
217 the overlap between species pairs throughout the modules (see Krasnov et al. 2012 for a  
218 previous application) and it ranges from 0 (no overlap) to 1 (identical distribution across  
219 modules). Note that this similarity matrix reflects the co-occurrence similarities at  
220 regional scale, thus ignoring distributional patterns at lower spatial scales (i.e. two  
221 species may have identical regional distribution but appear as segregated at the local  
222 scale). The resultant co-occurrence pairwise similarity matrix was used as dependent  
223 variable. We generated four different pairwise dis/similarity matrices to be used as  
224 explanatory variables. Two of them were used to account for environmental factors: (i)  
225 a climatic-niche similarity matrix and (ii) a habitat similarity matrix. The remaining two  
226 considered geographical and evolutionary factors: (iii) a spatial-connectivity matrix and  
227 (iv) a phylogenetic distance matrix.

228

229 *i) Climatic-niche similarity matrix.* We characterized the climatic niche of each *Carabus*  
230 species in the dataset following a similar approach as proposed by Broennimann et al.  
231 (2012). We selected six bioclimatic variables to account for the main water and energy  
232 aspects of climate –namely mean annual temperature, temperature of the warmest  
233 quarter, temperature of the driest quarter, total annual precipitation, total precipitation of  
234 the warmest quarter and total precipitation of the driest quarter– and altitudinal range to  
235 account for the effects of mesoclimatic gradients within each grid cell. These variables



236 may be among the main determinants of the distribution of *Carabus* species diversity  
237 within Europe (see Calatayud et al. 2016b). Bioclimatic variables were extracted from  
238 Worldclim (v1.4 Hijmans et al. 2005; available at <http://www.worldclim.org/>), whereas  
239 altitudinal data were derived from the 30-arcsecond digital elevation model GTOPO30  
240 (available at <https://lta.cr.usgs.gov/GTOPO30>). We conducted a principal component  
241 analysis on these variables to obtain a bidimensional climatic space defined by the two  
242 main axes, that explained 81.4% of the variance (Fig.S3.1). Finally, we divided this  
243 climatic space into a 100X100 grid and calculated species overlap in the gridded space  
244 using Schoener's index (see above).

245

246 *ii) Habitat similarity matrix.* The distribution of *Carabus* species may also be shaped by  
247 forest preferences (Turin et al. 2003). Accordingly, we used ten vegetation categories  
248 derived from MODIS Land Cover at 5-minute resolution (Evergreen broadleaf forest,  
249 deciduous needle-leaf forest, deciduous broadleaf forest, mixed forest, closed shrub  
250 lands, open shrub lands, woody savannas, savannas and grasslands; Channan et al.  
251 2014, available at <http://glcf.umd.edu/data/lc/>). For each species we computed the  
252 proportion of each category overlaying its range. With this, we computed pairwise  
253 similarities in the preference for different vegetation types using Schoener's index (see  
254 above).

255

256 *iii) Spatial connectivity matrix.* To evaluate the potential influence of geophysical  
257 barriers to dispersal on the current distribution of *Carabus* species, we first created a  
258 dispersal-cost surface by dividing the study area in 1 Km<sup>2</sup> grid cells and weighting each  
259 cell according to its topography (in this case, slope) and the presence of water bodies.  
260 Slope values ranged from 0 to 100 at each pixel, being 0 the lowest dispersal cost and  
261 100 the highest one, and were determined from GTOPO30 altitudinal data using the  
262 GRASS tool *r.slope* (GRASS Development Team 2017). Grid cells including water  
263 bodies as rasterized layers in the Nature Earth database (available at  
264 <http://www.natureearthdata.com/>) were further weighted by assigning arbitrary values  
265 of friction to the dispersal of *Carabus* species, namely 30% for cells containing rivers  
266 and lakes and 99% for cells that lay on sea water masses (note that *Carabus* species  
267 show hydrophilic adaptations). Then, the connectivity between all pairs of cells was  
268 calculated as the least-cost path over the dispersal-cost surface that connects both cells,  
269 using the "gdistance" R package (van Etten 2015). Finally, the spatial connectivity

270 between each pair of species' distributional ranges in the dataset was estimated as the  
271 average distance among all grid cells within the range of each species. Average  
272 distances were preferred over absolute least-cost distances to avoid disproportionate  
273 differences in spatial connectivity between overlapping and non-overlapping  
274 distributional ranges.

275

276 *iv) Phylogenetic distance matrix.* To unravel the evolutionary history of the *Carabus*  
277 lineage and assess the potential importance of evolutionary processes in determining the  
278 formation of *Carabus* species pool, we reconstructed a species-level time-calibrated  
279 molecular phylogeny including the 89 species for which we found available DNA  
280 information on ten markers (eight mitochondrial regions: 12S rDNA, 16S rDNA, 28S  
281 rDNA, ND4, ND5, COI, Cytb and PEPCK; plus two nuclear ones: anonymous locus  
282 and wingless; see Tables S4.1 and S4.2). We aligned each marker independently using  
283 different algorithms: MAFFT (Katoh and Standley 2013), Clustal X (Thompson et al.  
284 1994; Larkin et al. 2007), MUSCLE (Edgar 2004) and Kalign (Lassmann and  
285 Sonnhammer 2005), and selected the most reliable alignment for each marker using the  
286 multiple overlap score (MOS) provided by MUMSA (Lassmann and Sonnhammer  
287 2006). We removed ambiguous or poorly aligned positions from the alignments with  
288 trimAl (Capella-Gutiérrez et al. 2009). The final dataset included 5603 characters, and  
289 was used to conduct Bayesian phylogenetic inference with BEAST v.2.4.6 software  
290 (Bouckaert et al. 2014). We used a GTR model for sequence evolution, a Random Local  
291 Clock, a birth-death model prior, and 100 million of MCMC chain length searching for  
292 convergence. There is ongoing debate on the divergence time of the genus *Carabus*  
293 (Andujar et al. 2012, Deuve et al. 2012), hence molecular dating was conducted under  
294 two different scenarios. Firstly, according to Deuve et al. (2012), the crown age of  
295 *Carabus* was set at 17.3 Mya. Secondly, and according to Andujar et al. (2012), the  
296 origin of the group was set at 25.16 Mya. We used the software Tracer v 1.6 (available  
297 at <http://tree.bio.ed.ac.uk/software/tracer/>) to check for MCMC chains convergence, and  
298 FigTree v.1.4.2 (available at <http://tree.bio.ed.ac.uk/software/figtree/>) for viewing and  
299 editing the phylogenetic trees (see Figures S3.2 and S3.3). In order to account for  
300 topological and time-calibration uncertainties, we used 100 phylogenies sampled from  
301 the posterior distribution for each molecular dating scenario. In addition, we used  
302 taxonomic information and phylogenetic uncertainty methods (Rangel et al. 2015) to  
303 place species lacking molecular information into the phylogeny (see Appendix S1).

304 Thus, we derived 100 different phylogenetic hypotheses from each Bayesian posterior  
305 phylogeny by randomly inserting missing species within their most derived consensus  
306 clade based on taxonomic knowledge. In total, we generated 20,000 phylogenetic  
307 hypotheses (100 phylogenies per two molecular dating scenarios per 100 phylogenies  
308 accounting for uncertainties associated with lack of molecular data) that were used in  
309 subsequent analyses. Pairwise phylogenetic distances were calculated for each  
310 calibrated phylogeny using the function *cophenetic* implemented in the APE R package  
311 (Paradis et al. 2004).

312

313 We used generalized multiple regression on distance matrices and deviance  
314 partitioning to disentangle the relative importance of climatic niche, habitat preferences,  
315 dispersal barriers and evolutionary history in determining *Carabus* species pools in  
316 Europe. First, we conducted single regressions between the co-occurrence pairwise  
317 similarity matrix and each of the four explanatory matrices described above to seek for  
318 significant associations between the variables. We set a binomial family for error  
319 distribution and “logit” as the link function (see Ferrier et al. 2007 and Calatayud et al.  
320 2016a for a similar approach). To assess for significance, we randomized the observed  
321 species per module matrix using the independent swap algorithm (see above) to derive  
322 999 null occurrence similarity matrices. Then, we used simple regressions to relate each  
323 null similarity matrix with each one of the explanatory matrices. The relationship  
324 between an explanatory matrix and the observed species per module matrix was  
325 considered to be significant when it explained a higher proportion of the deviance than  
326 99% of the regressions performed on the null matrices. In the case of phylogenetic  
327 pairwise distances we repeated this procedure for each phylogenetic hypothesis to  
328 consider phylogenetic uncertainties, applying the same criterion for significance.  
329 Finally, we retained those variables that showed significant relationships, and conducted  
330 variance partitioning among explanatory matrices (Legendre and Legendre 2012) to  
331 explore patterns of covariation among niche similarities (i.e. climatic and habitat  
332 similarity matrices), dispersal barriers and phylogenetic history. We conducted the  
333 analyses for the co-occurrence into modules (i.e. regions) and sub-modules (i.e. sub-  
334 regions) both at a European and regional (i.e. co-occurrence into sub-modules of each  
335 module) scales.

336

337 **Ancestral range estimation**

338 Probabilistic models of geographic range evolution have proven to be of great utility to  
339 deal with historical biogeographical questions (see Ronquist and Sanmartín 2011 and  
340 references therein). Here we used these models to try to unravel whether, according to  
341 Wallace's ideas (1876), deep historical signals were eroded by Pleistocene glaciations in  
342 the configuration of European *Carabus* faunas. We used Maximum Likelihood  
343 approach for inferring geographical range evolution implemented in the R package  
344 BioGeoBears (Matzke 2014). BioGeoBears fits a variety of models that differ in their  
345 types of dispersal, extinction, sympatric speciation, vicariance and founder event  
346 speciation. We fitted the six available models (DEC, DEC+J, DIVALIKE,  
347 DIVALIKE+J, BAYAREALIKE, BAYAREALIKE+J, see Matzke 2013) to each of the  
348 20,000 phylogenetic hypotheses described above, comparing their informative capacity  
349 through the Akaike Information Criterion weighted by sample size (AICc). Species  
350 ranges were coded as present/absent in each module detected in the former network  
351 clustering.

352         The estimation of ancestral ranges usually tends to be more ambiguous in  
353 deeper nodes of the phylogeny, as the lability of geographical ranges would tend to blur  
354 deep-time signals (Losos and Glor 2003). Similarly, if the Pleistocene glacial periods  
355 had important effects in the distribution of species it could be expected that ancestral  
356 range estimations will increase in accuracy around the Pleistocene. That is, pre-  
357 Pleistocene signals on the evolution of distributional range will be blurred. To explore  
358 this, we seek to detect changes in the relationship between node age and the marginal  
359 probability of the single most-probable ancestral state at each internal node. We  
360 obtained these probabilities from the best model among the six geographical range  
361 evolution models in BioGeoBears (see above) and for each of the phylogenetic  
362 hypotheses described above. Then, general additive mixed models (GAMMs) were  
363 fitted to the node marginal probability as a function of node age, including the  
364 phylogenetic hypothesis as a random factor. Furthermore, since we found different best  
365 models for different phylogenetic hypotheses we included model type as a fixed  
366 variable. We also used generalized linear mixed models (GLMMs) combined with  
367 piecewise regression to detect potential major breakpoints (i.e. temporal shifts) in the  
368 relationship between marginal probability and node age for each of the two dating  
369 scenarios. Given the large amount of observations (130 nodes x 10,000 phylogenies) we  
370 firstly estimated the breakpoint independently for each phylogenetic hypothesis. To do  
371 so, we included the breakpoint as a new parameter in a generalized linear model of

372 marginal probabilities as a function of node age, minimizing the deviance of the fitted  
373 model using the function “optimize” in the R package lme4 (Bates et al. 2014). Finally,  
374 to assess significance we used the averaged breakpoint value in a GLMM with the same  
375 fixed formulation but including the phylogenetic hypothesis as a random factor.  
376 Because node marginal probabilities ranged between 0 and 1, we used a binomial family  
377 and a loglink function to fit all models.

378 It is worth mentioning that our dataset does not fulfil the assumption of  
379 ancestral range estimation models that phylogenies should include all extant lineages,  
380 since some *Carabus* lineages have representatives from outside Europe (mainly Asiatic  
381 species) that were not included in the analyses. However, the potential effect of such  
382 incomplete sampling should be similar as that of unrecorded clade extinctions, which  
383 have been estimated to have little effect on ancestral range reconstruction analyses  
384 (Matzke 2014). Nevertheless, we also conducted a simpler analysis to explore whether  
385 there is a temporal signal in the structuration of *Carabus* faunas coinciding with  
386 Pleistocene glaciations. To do so, we first generated a binomial variable based on the  
387 module affiliation of the species descending from each internal phylogenetic node.  
388 Thus, we gave a 1 to the phylogenetic nodes whose all descendant species were  
389 classified into the same region and 0 otherwise. Then, we fitted piecewise regression  
390 models of this variable as a function of node age using the approach previously  
391 explained. This analysis would serve to further elucidate if there is a breakpoint in the  
392 relationship between node age and the probability that all descendant species belong to  
393 the same region (see Appendix S2 for details and another complementary approach).

394 All analyses were carried out in R (R core team 2015), using the function *bam*  
395 of the package *mcvg* for GAMM (Wood et al. 2015) and the package *Lme4* for GLMM  
396 analyses (Bates et al. 2014).

397

## 398 **Results**

### 399 **Identification of regional faunas**

400 The *Carabus* occurrence network was significantly modular ( $M=0.385$ ,  $p=0.01$ ),  
401 dividing Europe in seven modules that group zoogeographically distinct regions with  
402 their associated faunas (i.e., different regional species pools; Figs. 2a and S3.4).  
403 Furthermore, all modules but module 2 showed significant sub-modular structure,  
404 presenting a decrease in modularity with latitude (mean  $M=0.316$ , ranging from 0.154  
405 to 0.468; all  $p$ -values  $< 0.05$ , see Table S4.3). Module 1 holds 21 species mainly living

406 in South-western Palearctic (Iberian Peninsula, North of Africa, Balearic Islands,  
407 Corsica, Sardinia and the western half of Sicilia). This module was subdivided into four  
408 submodules. Module 2 included only two species, both endemic of Crete. Module 3  
409 identified an East Mediterranean region including the Italic Peninsula, part of Greece  
410 and Turkey. This module holds 18 species and was subdivided into five submodules.  
411 Module 4 depicted a Central European region embracing the Alps and the Carpathian  
412 Mountains, as well as Central European plains. This module showed the highest species  
413 richness, including 49 *Carabus* species, and was split into four submodules. Module 5  
414 and module 6 comprised northern regions and showed the lowest species richness  
415 values, holding 10 species each. The former comprised Iceland and the British Isles and  
416 extended eastward up to the vicinity of the Ural Mountains. The latter included this  
417 mountain range and expanded to the easternmost zone of the study area. Both modules  
418 were divided into 3 submodules. Finally, module 7 included 21 species and embraced a  
419 south-eastern central European region expanding from the Carpathian Mountains to the  
420 south Ural Mountains. This module was split into three submodules.

421         Regarding transition zones between regions, and in agreement with our first  
422 hypothesis, we found that they were clearly associated with geographical barriers such  
423 as the Pyrenees, the Alps, the Carpathian and the Ural Mountains, as well as the Turkish  
424 Straits System (that connects the Black Sea to the Aegean separating the Anatolian and  
425 Greek peninsulas; Fig. 2b). Interestingly, we also identified a west-to-east transitional  
426 belt between southern and northern regions that closely followed the southern limits of  
427 the ice sheet at the Last Glacial Maximum (LGM). This transitional zone further  
428 suggested a link between the configuration of *Carabus* regional faunas and Pleistocene  
429 glacial conditions, supporting our hypothesis 2.

430

#### 431 **Correlates of regional co-occurrence**

432 Matrix regressions showed that deviance of species co-occurrences across regions,  
433 across sub-regions and within each region was significantly explained ( $p < 0.01$ ),  
434 primarily by environmental niche similarity, and secondarily by spatial connectivity,  
435 except for northern regions (i.e. modules 5 and 6; Fig. 3 and Table S4.4). In contrast,  
436 relationships with evolutionary relatedness were no significant in all instances and  
437 regardless of the phylogenetic hypothesis used ( $p > 0.01$  in all cases, see Table S4.4).  
438 Comparing both types of subdivisions, environmental niche similarity explained more  
439 deviance across sub-regions than across regions, whereas spatial connectivity did the



440 reverse (see Fig. 3). Comparing explained deviances between regions, the primacy of  
441 environmental niche similarity (mostly climate, see Table S4.4) in the northern ones (5  
442 and 6) is consistent with the notion that northern regional pools are geographically  
443 sorted by current climate (our hypothesis 3), whereas the importance shown by spatial  
444 connectivity in the remaining regions is consistent with the more complex orography of  
445 central and southern Europe (consistent with hypothesis 4).

446

#### 447 **Ancestral range estimation**

448 Because both phylogenetic datasets (i.e. alternative calibration scenarios) yielded very  
449 similar qualitative and quantitative results (see Figure S3.5 and Table S4.5), we only  
450 present here ancestral range estimations based on Deuve's et al. (2012) calibration.  
451 BAYAREALIKE+J and DEC+J were the best models for 79% and 19.7% of the  
452 phylogenetic hypotheses, respectively (Table 1). Interestingly, both models consider  
453 founder event speciation, which could be an indication of Pleistocene glaciations  
454 promoting speciation in glacial refugia (i.e. acting as islands). Moreover, according to  
455 the BAYAREALIKE+J model the range contraction parameter had the highest estimate  
456 (extinction parameter in Table 1), which could be also expected due to a generalized  
457 range erosion of glaciations. This parameter was however of little importance in the  
458 DEC+J model, which accounted for vicariant events. Regardless of the biogeographical  
459 model used, GAMM results showed that node marginal probability of the most probable  
460 state increased as expected towards younger nodes ( $P < 0.01$ ,  $R^2 = 0.26$ ). However, this  
461 increase showed steep increments at the border between the Miocene and the Pliocene  
462 and, more abruptly, coinciding with the beginning of the Pleistocene c. 2.59 Mya  
463 (Fig.4). Indeed, piecewise regression revealed that the relationship between marginal  
464 state probability and node age changed at 2.16 Mya (median value; with 45<sup>th</sup> and 55<sup>th</sup>  
465 percentiles at 1.68 and 2.94 Mya., respectively). This points to a distinct signal of the  
466 Pleistocene on the phylogenetic configuration of European *Carabus* faunas, providing  
467 support for our hypothesis 6. These results were confirmed by the complementary  
468 binomial analysis, which showed a breakpoint at 3.70 Mya. (45<sup>th</sup> and 55<sup>th</sup> percentiles at  
469 2.47 and 4.48 Mya.; see also Appendix S2). The breakpoint associated to the Pliocene-  
470 Pleistocene transition was significant in all cases ( $P < 0.01$ ).

471

#### 472 **Discussion**



473 More than 140 years ago, Wallace (1876) foresaw that the influence of Pleistocene  
474 glaciations on the distribution of diversity had been strong enough to erode the imprint  
475 of previous events. Our results support Wallace's thoughts, showing a remarkable  
476 coincidence between the distribution of the ice sheets at the Last Glacial Maximum and  
477 the current configuration and evolutionary structure of European *Carabus* Faunas.

478 The first line of evidence supporting this idea comes from the close spatial  
479 relationship between the southern limits of the ice sheet at LGM and the transition zone  
480 separating the southern and northern regions. This border also coincides with the line –  
481 identified by Calatayud et al. (2016b)– where the relationship between *Carabus* species  
482 richness and current climate changes (Fig. 2). Thus, it seems that the climate changes  
483 underwent during the Pleistocene not only shaped phylogeographic (Avisé et al. 1998;  
484 Hewitt 1999; Barnes et al. 2002; Johnson et al. 2004; Theissinger et al. 2013) and  
485 species richness patterns (e.g. Svenning and Skov 2007, Araújo et al. 2008, Hortal et al.  
486 2011, Calatayud et al. 2016b), but that Ice ages have also left a strong imprint on the  
487 geographical structure of species composition at a regional scale. Accordingly, the  
488 species from the northernmost region (module 5) show the lowest level of endemism  
489 (Fig. S3.6), as expected for regional faunas composed of species that have recently  
490 colonized the north of Europe from southern glacial refugia (Araújo et al. 2008,  
491 Calatayud et al. 2016b, our hypothesis 5). In fact, although these species show large  
492 distribution ranges in different parts of southern Europe, their ranges only overlap near  
493 the northern Carpathian Mountains (Fig. S3.7). This area was a glacial refugia for a  
494 large and taxonomically diverse array of northern European species (Ursenbacher et al.  
495 2006; Sommer and Nadachowski, 2006, Provan and Bennett 2008), including *Carabus*  
496 (Homburg et al. 2013, Fig. S3). Additionally, the decrease in modularity values with  
497 latitude also points to a lesser geographical structure of northern assemblages, which  
498 can be interpreted as the result of a post-glacial colonization, together with less  
499 geographic complexity in some areas.

500 Besides the Pleistocene effects in the definition and geographical structure of  
501 regional species pools, we also found evidence of the imprint of this geological period  
502 on the processes configuring the distribution of *Carabus* faunas. The general strong  
503 relationship between regional patterns of co-occurrence and both niche similarities and  
504 spatial connectivity shows that co-occurring species tend to have similar realized  
505 environmental niches and that also tend to be geographically constrained by the same  
506 dispersal barriers. This latter result was expected given the –presumed– low dispersal

507 capacity of *Carabus* species (see Turin et al. 2003), which is likely to be behind the  
508 spatial coincidence of module transition zones and geographical barriers. Perhaps more  
509 unexpected is the weak effect of phylogenetic distances despite the strong relationship  
510 between regional co-occurrence and niche similarities. This implies that geographical  
511 barriers rather than climatic-niche conservatism have restricted species distributions  
512 even within regions of similar climate. These results also point to that *Carabus* niche  
513 evolution is, to some extent, evolutionarily unconstrained, which is congruent with the  
514 general high adaptation capacity of insects (e.g. Overgaard and Sørensen 2008).

515         Whatever the origin of the relationship between species occurrence and  
516 environmental conditions, what is certainly true is that its strength changes between  
517 regions. These changes follow a latitudinal gradient in the importance of environmental  
518 niche similarities. The occurrence into sub-regions is more strongly related to the  
519 similarity in the realized niche in the north than in the south. This might be a direct  
520 consequence of the effects of post-glacial colonization, where formerly glaciated areas  
521 show a clear sorting of species due to its environmental preferences. On the contrary, in  
522 southern regions, species are expected to had have more time to diversify and sort  
523 geographically by other factors besides climate (Hortal et al. 2011). Our findings  
524 partially corroborated this idea since we found strong effects of dispersal barriers in  
525 these areas. Yet, a longer time for speciation should have also resulted in some  
526 phylogenetic signal in southern regions, which was not supported by our results.

527         This generalized lack of phylogenetic structuration of *Carabus* faunas can be  
528 the outcome of –relatively– recent speciation events due to vicariance and/or a “cul-de-  
529 sac effect” (O’Regan 2008). The former would imply the formation of dispersal barriers  
530 promoting the geographical split of many lineages and subsequent allopatric speciation  
531 (Weeks et al. 2016). Yet, the geophysical accidents that can be associated with the  
532 limits of the *Carabus* regions we found here largely predate the origin of the genus (see  
533 Beccaluva et al. 1998, Deuve et al. 2012). On the other hand, a generalized dispersion  
534 into climatic refugia, together with a subsequent stagnancy within them (i.e. a “cul-de-  
535 sac” effect) may also produce the observed mixing of unrelated linages into regions.  
536 Although it is difficult to distinguish between both processes, the latter seems more  
537 plausible, with southern regions accumulating unrelated species while acting as glacial  
538 refugia, and northern ones being recolonized by unrelated species with similar  
539 environmental niches and/or simply higher dispersal capacity (Svenning and Skov

540 2007). Future studies are required to elucidate which specific mechanisms allowed  
541 some *Carabus* species to colonize northern latitudes.

542 In agreement with this idea, the model of ancestral range estimation that is  
543 best supported by the data does not include vicariant events. On the contrary, this model  
544 considers founder speciation events, a process typically associated with islands (Provine  
545 1989). As such, this could be interpreted on the light of southern regions acting as  
546 islands during the different Pleistocene glacial maxima. Nevertheless, these results must  
547 be taken with caution because some assumptions of ancestral estimation models were  
548 not fully satisfied, and because of the low predictive power of these models (i.e. low  
549 marginal probabilities). Nevertheless, marginal probabilities showed a steeper increase  
550 coinciding with the Pliocene-Pleistocene transition, which is a more reliable result.  
551 Indeed, this result was consistent with the more conservative binomial analysis and  
552 across the different time calibration scenarios. This remarkable temporal coincidence  
553 supports that the current regional organization of *Carabus* species and lineages is rooted  
554 at the beginning of the Pleistocene, which also explains the lack of phylogenetic  
555 structure of regional *Carabus* faunas. Our results contrast with ancestral range  
556 estimations for clades inhabiting areas that were never glaciated, where more ancient  
557 signals were found in the spatial sorting of lineages (Condamine et al. 2015, Economo  
558 et al. 2015, Tänzler et al. 2016, Toussaint and Balke 2016). Hence, it seems that the  
559 repeated advances and retreats of ice sheets and glacial conditions that characterize the  
560 European Pleistocene produced repeated cycles of retreat to southern regions and  
561 advance towards the north of *Carabus* species, a hustle-and-bustle process that  
562 ultimately led to the observed mixing of unrelated lineages.

563 To summarize, our results provide solid arguments in favour of the importance  
564 of Pleistocene glaciations along with geographical barriers and niche-based processes in  
565 structuring the regional faunas of European *Carabus*. On the one hand, this group's  
566 faunas are primarily delimited by the location of the southern limit of the ice sheet at  
567 LGM, which separates two large regions that differ not only in species composition, but  
568 also in the processes underlying the spatial organization of these species. On the other  
569 hand, the phylogenetic structure of these faunas coincides with the beginning of the  
570 Pleistocene. This implies that the geographical distribution of species and lineages is  
571 profoundly shaped by past climates. Moreover, our results also suggest that local  
572 ecological processes (Naeslund and Norberg 2006, Madrigal et al. 2016) and  
573 evolutionary mechanisms (Wüest et al. 2015, Calatayud et al. 2016a) may be

574 profoundly affected by the history of Earth climatic. Hence, the study of these historical  
575 events may be essential to unravel both large and local scale diversity patterns.

576

### 577 **Acknowledgements**

578 We are very grateful to Achille Casale for providing data on *Carabus* habitat  
579 preferences and comments on an early version of the phylogeny, and the Scientific  
580 Computation Centre of Andalusia (CICA) for the computing services they provided. We  
581 acknowledge insightful discussions with Hortal lab members. JC was supported by a  
582 FPU-fellowship of the Spanish Ministry of Education (FPU12/00575). This work is  
583 partly supported by the Spanish Ministry of Economy, Industry and Competitiveness  
584 (MINECO) project SCARPO (CGL2011-29317) to JC and JH. MAR and RMV were  
585 supported through the grants CGL2017-86926-P and CGL2013-48768-P. ML and JLH  
586 were supported by MINECO FPI and Juan de La Cierva grants, respectively.

587

### 588 **Author contributions**

589 JC and JH conceived research. JC designed the study with contributions of all authors.  
590 JC, RMV, ML and JLH analysed the data. All authors discussed results. JC wrote the  
591 paper with contributions of all authors.

592

### 593 **References**

- 594 1. Andújar, C., Serrano, J. and Gómez-Zurita, J. 2012. Winding up the molecular clock  
595 in the genus *Carabus* (Coleoptera: Carabidae): assessment of methodological  
596 decisions on rate and node age estimation. *BMC evolutionary biology*, **12**: 40.
- 597 2. Araújo, M. B., D. Nogués-Bravo, J. A. F. Diniz-Filho, A. M. Haywood, P. J. Valdes,  
598 and C. Rahbek. 2008. Quaternary climate changes explain diversity among reptiles  
599 and amphibians. *Ecography* **31**:8–15.
- 600 3. Avise, J. C., Walker, D., and Johns, G. C. 1998. Speciation durations and Pleistocene  
601 effects on vertebrate phylogeography. *Proceedings of the Royal Society of London*  
602 *B: Biological Sciences* **265**: 1707-1712.
- 603 4. Barber, M. J. 2007. Modularity and community detection in bipartite networks.  
604 *Physical Review E* **76**:066102.
- 605 5. Barnes, I., P. Matheus, B. Shapiro, D. Jensen, and A. Cooper. 2002. Dynamics of  
606 Pleistocene population extinctions in Beringian brown bears. *Science* **295**:2267–  
607 2270.
- 608 6. Bates, D., M. Maechler, B. Bolker, S. Walker, et al. 2014. lme4: Linear mixed-  
609 effects models using Eigen and S4. R package version **1**.

- 610 7. Beccaluva, L., M. Shallo, M. Coltorti, I. Premti, and F. Siena. 1998. Encyclopedia of  
611 European and Asian Regional Geology. Springer.
- 612 8. Blondel, V. D., J.-L. Guillaume, R. Lambiotte, and E. Lefebvre. 2008. Fast unfolding  
613 of communities in large networks. *Journal of Statistical Mechanics* **2008**:P10008.
- 614 9. Broennimann, O., M. C. Fitzpatrick, P. B. Pearman, B. Petitpierre, L. Pellissier, N. G.  
615 Yoccoz, W. Thuiller, M.-J. Fortin, C. Randin, N. E. Zimmermann, et al. 2012.  
616 Measuring ecological niche overlap from occurrence and spatial environmental  
617 data. *Global Ecology and Biogeography* **21**:481–497.
- 618 10. Calatayud, J., J. L. Hórreo, J. Madrigal-González, A. Migeon, M. Á. Rodríguez,  
619 S. Magalhães, and J. Hortal. 2016a. Geography and major host evolutionary  
620 transitions shape the resource use of plant parasites. *Proceedings of the National  
621 Academy of Sciences USA* **113**:9840–9845.
- 622 11. Calatayud, J., J. Hortal, N. G. Medina, H. Turin, R. Bernard, A. Casale, V. M. Ortuño,  
623 L. Penev, and M. Á. Rodríguez. 2016b. Glaciations, deciduous forests, water  
624 availability and current geographical patterns in the diversity of European *Carabus*  
625 species. *Journal of Biogeography* **43**:2343–2353.
- 626 12. Capella-Gutiérrez, S., J.M. Silla-Martínez, and T. Gabaldón. 2009. trimAl: a tool for  
627 automated alignment trimming in large-scale phylogenetic analyses.  
628 *Bioinformatics* **25**:1972–1973.
- 629 13. Cardillo, M. 2011. Phylogenetic structure of mammal assemblages at large  
630 geographical scales: linking phylogenetic community ecology with macroecology.  
631 *Philosophical Transactions of the Royal Society of London B* **366**:2545–2553.
- 632 14. Channan, S., K. Collins, and W. Emanuel. 2014. Global mosaics of the standard  
633 MODIS land cover type data. University of Maryland and the Pacific Northwest  
634 National Laboratory, College Park, Maryland, USA.
- 635 15. Colwell, R. K., and T. F. Rangel. 2009. Hutchinson’s duality: the once and future  
636 niche. *Proceedings of the National Academy of Sciences USA* **106**:19651–19658.
- 637 16. Condamine, F. L., E. F. Toussaint, A.-L. Clamens, G. Genson, F. A. Sperling, and G. J.  
638 Kergoat. 2015. Deciphering the evolution of birdwing butterflies 150 years after  
639 Alfred Russel Wallace. *Scientific Reports* **5**:11860.
- 640 17. Crisp, M. D., S. A. Trewick, and L. G. Cook. 2011. Hypothesis testing in  
641 biogeography. *Trends in Ecology and Evolution* **26**:66–72.
- 642 18. Deuve, T., A. Cruaud, G. Genson, and J.-Y. Rasplus. 2012. Molecular systematics  
643 and evolutionary history of the genus *Carabus* (Col. Carabidae). *Molecular  
644 Phylogenetics and Evolution* **65**:259–275.
- 645 19. Ebach, M.C. 2015. *Origins of Biogeography*. Springer, New York.
- 646 20. Economo, E. P., E. M. Sarnat, M. Janda, R. Clouse, P. B. Klimov, G. Fischer, B. D.  
647 Blanchard, L. N. Ramirez, A. N. Andersen, M. Berman, et al. 2015. Breaking out of  
648 biogeographical modules: range expansion and taxon cycles in the hyperdiverse  
649 ant genus *Pheidole*. *Journal of Biogeography* **42**:2289–2301.
- 650 21. Edgar, R. C. 2004. MUSCLE: multiple sequence alignment with high accuracy and  
651 high throughput. *Nucleic Acids Research* **32**:1792–1797.
- 652 22. Ehlers, J., and P. L. Gibbard. 2004. Quaternary glaciations—extent and chronology:  
653 part I: Europe. Elsevier.
- 654 23. Ferrier, S., G. Manion, J. Elith, and K. Richardson. 2007. Using generalized  
655 dissimilarity modelling to analyse and predict patterns of beta diversity in regional  
656 biodiversity assessment. *Diversity and Distributions* **13**:252–264.



- 657 24. Gouveia, S. F., J. Hortal, M. Tejedo, H. Duarte, F. A. Cassemiro, C. A. Navas, and  
658 J. A. F. Diniz-Filho. 2014. Climatic niche at physiological and macroecological  
659 scales: the thermal tolerance–geographical range interface and niche  
660 dimensionality. *Global Ecology and Biogeography* **23**:446–456.
- 661 25. GRASS Development Team, 2017. Geographic Resources Analysis Support System  
662 (GRASS GIS) Software, Version 7.2. Open Source Geospatial Foundation.  
663 <http://grass.osgeo.org>.
- 664 26. Guimerà, R., and L. A. N. Amaral. 2005. Functional cartography of complex  
665 metabolic networks. *Nature* **433**:895–900.
- 666 27. Hewitt, G. M. 1999. Post-glacial re-colonization of European biota. *Biological*  
667 *Journal of the Linnean Society* **68**:87–112.
- 668 28. Hijmans, R. J., S. E. Cameron, J. L. Parra, P. G. Jones, and A. Jarvis. 2005. Very high  
669 resolution interpolated climate surfaces for global land areas. *International*  
670 *Journal of Climatology* **25**:1965–1978.
- 671 29. Holt, B. G., J.-P. Lessard, M. K. Borregaard, S. A. Fritz, M. B. Araújo, D. Dimitrov, P.-  
672 H. Fabre, C. H. Graham, G. R. Graves, K. A. Jønsson, et al. 2013. An update of  
673 Wallace’s zoogeographic regions of the world. *Science* **339**:74–78.
- 674 30. Homburg, K., C. Drees, M. M. Gossner, L. Rakosy, A. Vrezec, and T. Assmann. 2013.  
675 Multiple glacial refugia of the low-dispersal ground beetle *Carabus irregularis*:  
676 molecular data support predictions of species distribution models. *PloS One*  
677 **8**:e61185.
- 678 31. Hortal, J., P. De Marco Jr, A. Santos, and J. A. F. Diniz-Filho. 2012. Integrating  
679 biogeographical processes and local community assembly. *Journal of*  
680 *Biogeography* **39**:627–628.
- 681 32. Hortal, J., J. A. F. Diniz-Filho, L. M. Bini, M. Á. Rodríguez, A. Baselga, D. Nogués-  
682 Bravo, T. F. Rangel, B. A. Hawkins, and J. M. Lobo. 2011. Ice age climate,  
683 evolutionary constraints and diversity patterns of European dung beetles. *Ecology*  
684 *Letters* **14**:741–748.
- 685 33. Hortal, J., J. M. Lobo, and A. Jiménez-Valverde. 2012. Basic questions in  
686 biogeography and the (lack of) simplicity of species distributions: putting species  
687 distribution models in the right place. *Natureza & Conservação* **10**:108–118.
- 688 34. Hortal, J., N. Roura-Pascual, N. Sanders, and C. Rahbek. 2010. Understanding  
689 (insect) species distributions across spatial scales. *Ecography* **33**:51.
- 690 35. Johnson, N. K., C. Cicero, and K. Shaw. 2004. New mitochondrial DNA data affirm  
691 the importance of Pleistocene speciation in North American birds. *Evolution*  
692 **58**:1122–1130.
- 693 36. Katoh, K., and D. M. Standley. 2013. MAFFT multiple sequence alignment software  
694 version 7: improvements in performance and usability. *Molecular Biology and*  
695 *Evolution* **30**:772–780.
- 696 37. Kembel, S. W., P. D. Cowan, M. R. Helmus, W. K. Cornwell, H. Morlon, D. D.  
697 Ackerly, S. P. Blomberg, and C. O. Webb. 2010. Picante: R tools for integrating  
698 phylogenies and ecology. *Bioinformatics* **26**:1463–1464.
- 699 38. Krasnov, B. R., M. A. Fortuna, D. Mouillot, I. S. Khokhlova, G. I. Shenbrot, and  
700 R. Poulin. 2012. Phylogenetic signal in module composition and species  
701 connectivity in compartmentalized host-parasite networks. *The American*  
702 *Naturalist* **179**:501–511.

- 703 39. Lassmann, T. and E. L. Sonnhammer. 2005. Kalign - an accurate and fast multiple  
704 sequence alignment algorithm. *BMC bioinformatics* **6**:1–9.
- 705 40. Lassmann, T. and E. L. Sonnhammer. 2006. Kalign, Kalignvu and Mumsa: web servers  
706 for multiple sequence alignment. *Nucleic Acids Research* **34**: W596-W599
- 707 41. Legendre, P., and L. F. Legendre. 2012. *Numerical ecology*. Elsevier.
- 708 42. Losos, J. B., and R. E. Glor. 2003. Phylogenetic comparative methods and the  
709 geography of speciation. *Trends in Ecology and Evolution* **18**:220–227.
- 710 43. Madrigal-González, J., P. Ruiz-Benito, S. Ratcliffe, J. Calatayud, G. Kändler,  
711 A. Lehtonen, J. Dahlgren, C. Wirth, and M. A. Zavala. 2016. Complementarity  
712 effects on tree growth are contingent on tree size and climatic conditions across  
713 Europe. *Scientific Reports* **6**:32233.
- 714 44. Matzke, N. J., 2013. BioGeoBEARS: BioGeography with Bayesian (and Likelihood)  
715 Evolutionary Analysis in R Scripts. University of California, Berkeley, Berkeley, CA.  
716 <http://CRAN.R-project.org/package=BioGeoBEARS>.
- 717 45. Matzke, N. J. 2014. Model selection in historical biogeography reveals that  
718 founder-event speciation is a crucial process in island clades. *Systematic Biology*  
719 **63**:51–70.
- 720 46. Mazerolle, M. J. 2011. AICcmodavg: model selection and multimodel inference  
721 based on (Q) AIC (c). R package version **1**.
- 722 47. Medina, N. G., B. Albertos, F. Lara, V. Mazimpaka, R. Garilleti, D. Draper, and  
723 J. Hortal. 2014. Species richness of epiphytic bryophytes: drivers across scales on  
724 the edge of the Mediterranean. *Ecography* **37**:80–93.
- 725 48. Mittelbach, G. G., and D. W. Schemske. 2015. Ecological and evolutionary  
726 perspectives on community assembly. *Trends in Ecology and Evolution* **30**:241–  
727 247.
- 728 49. Mucha, P. J., T. Richardson, K. Macon, M. A. Porter, and J.-P. Onnela. 2010.  
729 Community structure in time-dependent, multiscale, and multiplex networks.  
730 *Science* **328**:876–878.
- 731 50. Naeslund, B., and Norberg, J. 2006. Ecosystem consequences of the regional  
732 species pool. *Oikos*, **115**:504-512.
- 733 51. O'Regan, H. J. 2008. The Iberian Peninsula—corridor or cul-de-sac? Mammalian  
734 faunal change and possible routes of dispersal in the last 2 million years.  
735 *Quaternary Science Reviews* **27**:2136–2144.
- 736 52. Overgaard, J., and J. G. Sørensen. 2008. Rapid thermal adaptation during field  
737 temperature variations in *Drosophila melanogaster*. *Cryobiology* **56**:159–162.
- 738 53. Paradis, E., J. Claude and K. Strimmer. 2004. APE: analyses of phylogenetics and  
739 evolution in R language. *Bioinformatics* **20**:289-290.
- 740 54. Provan, J., and Bennett, K. D. 2008. Phylogeographic insights into cryptic glacial  
741 refugia. *Trends in ecology & evolution* **23**: 564-571.
- 742 55. Provine, W. B., 1989. Founder effects and genetic revolutions in microevolution  
743 and speciation: an historical perspective. Pp. 43–76 in L. Val Giddings and K. Y.  
744 Kaneshiro, editors. *Genetics, speciation, and the founder principle*. Oxford  
745 University Press.
- 746 56. R Core Team, 2015. R: A Language and Environment for Statistical Computing. R  
747 Foundation for Statistical Computing, Vienna, Austria. <http://www.R-project.org/>.



- 748 57. Rangel, T. F., R. K. Colwell, G. R. Graves, K. Fučíková, C. Rahbek, and J. A. F. Diniz-  
749 Filho. 2015. Phylogenetic uncertainty revisited: Implications for ecological  
750 analyses. *Evolution* **69**:1301–1312.
- 751 58. Ricklefs, R. E. 2008. Disintegration of the ecological community. *The American*  
752 *Naturalist* **172**:741–750.
- 753 59. Ricklefs, R. E. 2011. Applying a regional community concept to forest birds of  
754 eastern North America. *Proceedings of the National Academy of Sciences USA*  
755 **108**:2300–2305.
- 756 60. Ricklefs, R. E. 2015. Intrinsic dynamics of the regional community. *Ecology Letters*  
757 **18**:497–503.
- 758 61. Ricklefs, R. E., and F. He. 2016. Region effects influence local tree species diversity.  
759 *Proceedings of the National Academy of Sciences USA* **113**:674–679.
- 760 62. Ronquist, F., and I. Sanmartín. 2011. Phylogenetic methods in biogeography.  
761 *Annual Review of Ecology, Evolution and Systematics* **42**:441–464.
- 762 63. Rueda, M., M. Á. Rodríguez, and B. A. Hawkins. 2013. Identifying global  
763 zoogeographical regions: lessons from Wallace. *Journal of Biogeography* **40**:2215–  
764 2225.
- 765 64. Schoener, T. W. 1970. Nonsynchronous spatial overlap of lizards in patchy  
766 habitats. *Ecology* **51**:408–418.
- 767 65. Sommer, R. S., and Nadachowski, A. 2006. Glacial refugia of mammals in Europe:  
768 evidence from fossil records. *Mammal Review* **36**: 251–265.
- 769 66. Svenning, J.-C., W. L. Eiserhardt, S. Normand, A. Ordoñez, and B. Sandel. 2015. The  
770 influence of paleoclimate on present-day patterns in biodiversity and ecosystems.  
771 *Annual Review of Ecology, Evolution and Systematics* **46**:551–572.
- 772 67. Svenning, J.-C., and F. Skov. 2007. Could the tree diversity pattern in Europe be  
773 generated by postglacial dispersal limitation? *Ecology Letters* **10**:453–460.
- 774 68. Tänzler, R., M. H. Van Dam, E. F. Toussaint, Y. R. Suhardjono, M. Balke, and  
775 A. Riedel. 2016. Macroevolution of hyperdiverse flightless beetles reflects the  
776 complex geological history of the Sunda Arc. *Scientific Reports* **6**:18793.
- 777 69. Theissinger, K., M. Bálint, K. A. Feldheim, P. Haase, J. Johannesen, I. Laube, and  
778 S. U. Pauls. 2013. Glacial survival and post-glacial recolonization of an arctic–alpine  
779 freshwater insect (*Arcynopteryx dichroa*, *Plecoptera*, *Perlodidae*) in Europe.  
780 *Journal of Biogeography* **40**:236–248.
- 781 70. Thompson, J. D., D. G. Diggins, and T. J. Gibson. 1994. CLUSTAL W: improving the  
782 sensitivity of progressive multiple sequence alignment through sequence  
783 weighting, position-specific gap penalties and weight matrix choice. *Nucleic Acids*  
784 *Research* **22**:4673–4680.
- 785 71. Toussaint, E. F., and M. Balke. 2016. Historical biogeography of *Polyura* butterflies  
786 in the oriental Palaeotropics: trans-archipelagic routes and South Pacific island  
787 hopping. *Journal of Biogeography* **43**:1560–1572.
- 788 72. Turin, H., L. Penev, A. Casale, E. Arndt, T. Assmann, K. Makarov, D. Mossakowski,  
789 G. Szél, F. Weber, H. Turin, et al., 2003. Species accounts. Pp. 151–284 in H. Turin,  
790 L. Penev, and A. Casale, editors. *The Genus Carabus in Europe: A Synthesis*.  
791 Pensoft Publishers.
- 792 73. Ursenbacher, S., Carlsson, M., Helfer, V., Tegelström, H., and Fumagalli, L. 2006.  
793 Phylogeography and Pleistocene refugia of the adder (*Vipera berus*) as inferred  
794 from mitochondrial DNA sequence data. *Molecular Ecology* **15**: 3425–3437.

- 795 74. van Etten, J., 2015. gdistance: Distances and Routes on Geographical Grids.  
796 <http://CRAN.R-project.org/package=gdistance>.
- 797 75. Wallace, A. R. 1876. The geographical distribution of animals: with a study of the  
798 relations of living and extinct faunas as elucidating the past changes of the earth's  
799 surface. Cambridge University Press.
- 800 76. Warren, D. L., M. Cardillo, D. F. Rosauer, and D. I. Bolnick. 2014. Mistaking  
801 geography for biology: inferring processes from species distributions. Trends in  
802 Ecology and Evolution **29**:572–580.
- 803 77. Weeks, B. C., S. Claramunt, and J. Cracraft. 2016. Integrating systematics and  
804 biogeography to disentangle the roles of history and ecology in biotic assembly.  
805 Journal of Biogeography **43**:1546–1559.
- 806 78. Wood, S.N., Goude, Y. and Shaw S. 2015. Generalized additive models for large  
807 datasets. Journal of the Royal Statistical Society, Series C **64**: 139–155.
- 808 79. Wüest, R. O., A. Antonelli, N. E. Zimmermann, and H. P. Linder. 2015. Available  
809 climate regimes drive niche diversification during range expansion. The American  
810 Naturalist **185**:640–652.

811 **Table 1.** Results of ancestral range estimation models. LnL= model likelihood; N°  
812 param.= number of model parameters; d= dispersion, e= extinction; j= founder  
813 speciation. W. AICc= Weighted AICc. Prop. best= proportion of phylogenetic  
814 hypotheses where a model was the best in terms of AICc. Mean values among different  
815 phylogenetic hypotheses (incl. confidence interval at  $\alpha = 0.05$ ) are shown for each  
816 parameter.  
817

| Model         | LnL            | N° param. | d           | e           | j           | W. AICc     | Prop. best |
|---------------|----------------|-----------|-------------|-------------|-------------|-------------|------------|
| DEC           | -470.874±0.184 | 2         | 0.038±0.000 | 0.005±0.000 | 0.000±0.000 | 0.038±0.002 | 0.015      |
| DEC+J         | -466.778±0.171 | 3         | 0.035±0.000 | 0.000±0.000 | 0.013±0.000 | 0.184±0.006 | 0.196      |
| DIVALIKE      | -494.288±0.251 | 2         | 0.043±0.000 | 0.001±0.000 | 0.000±0.000 | 0.000±0.000 | 0.000      |
| DIVALIKE+J    | -491.668±0.242 | 3         | 0.041±0.000 | 0.000±0.000 | 0.008±0.000 | 0.000±0.000 | 0.000      |
| BAYAREALIKE   | -484.996±0.314 | 2         | 0.024±0.000 | 0.153±0.000 | 0.000±0.000 | 0.004±0.001 | 0.002      |
| BAYAREALIKE+J | -460.390±0.200 | 3         | 0.021±0.000 | 0.066±0.001 | 0.019±0.000 | 0.775±0.007 | 0.790      |

818

819 **Figure 1.**

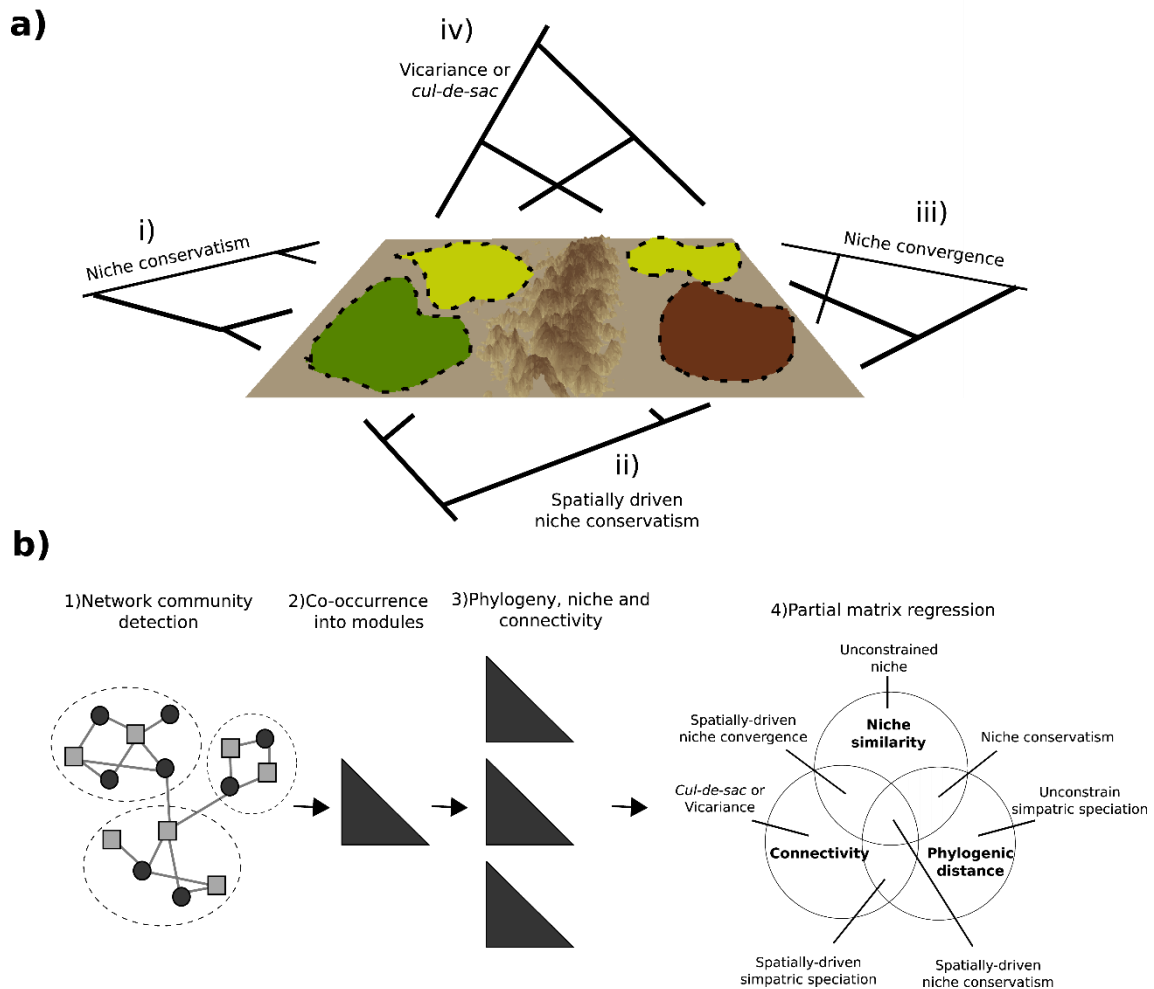

820  
 821 **Figure 1.** Identifying the factors configuring regional faunas. a) Four (out of seven, see  
 822 b) hypothetical processes that may configure Regional faunas. Dotted lines depict  
 823 different regions while colours correspond with different climates. In each case, the tips  
 824 of the phylogeny point to regional distribution of the species. b) Workflow and potential  
 825 results: 1) Hypothetical results of modularity analysis over the occurrence network; 2)  
 826 similarity matrix of occurrence into modules; 3) pairwise matrix of environmental niche  
 827 similarities; phylogenetic distances and topographical connectivity; and 4) hypothetical  
 828 results and interpretations of a partial matrix regression on species occurrence  
 829 similarities as a function of niche similarities, phylogenetic distances and connectivity.  
 830

831 **Figure 2.**

a)

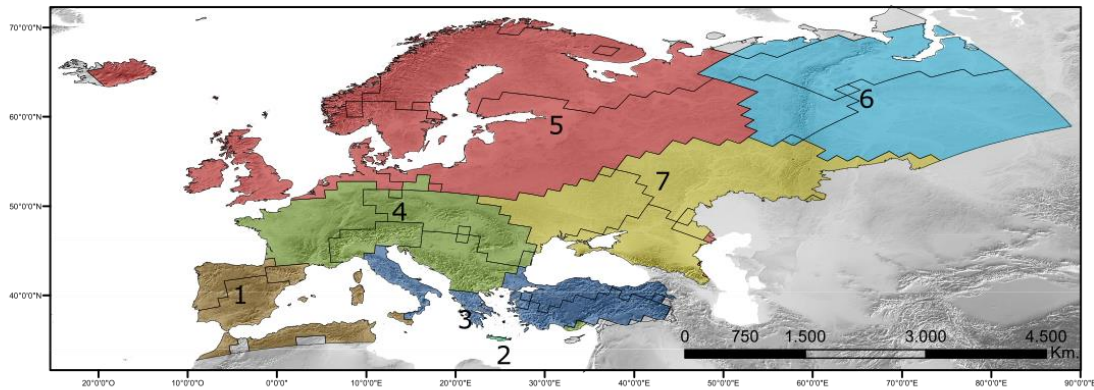

b)

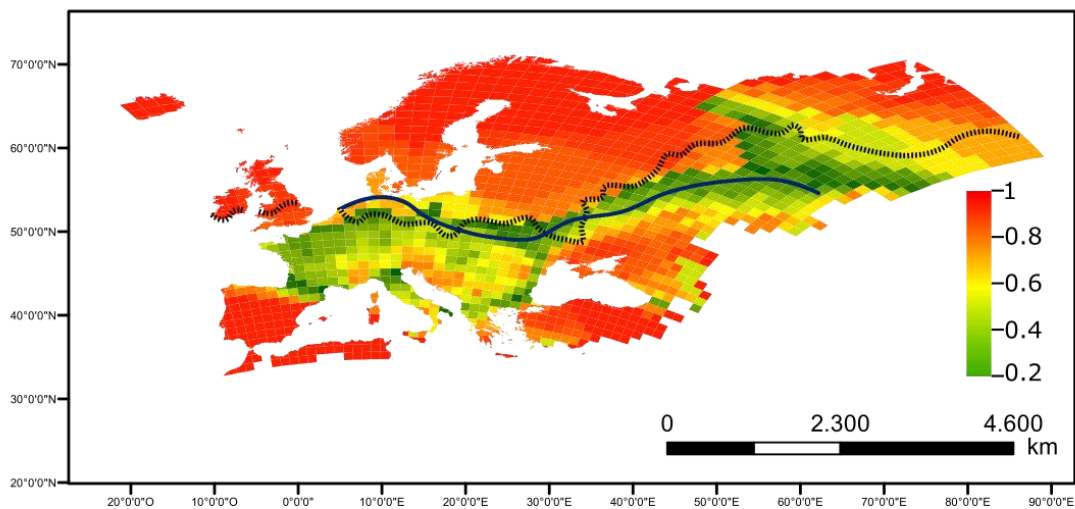

832

833 **Figure 2.** European *Carabus* regions found by the network community detection  
834 analysis. a) Geographical location of modules (i.e. regions) and submodules (i.e. sub-  
835 sub-regions). b) Values of module affinity per grid cell; green colours (i.e. cells with low  
836 affinity) identify transition zones. The dotted black line corresponds with the southern  
837 limit of the ice sheet at LGM (extracted from Ehlers and Gibbard 2004). The blue line  
838 depicts the breakpoint where the temperature-*Carabus* richness relationship changes, as  
839 found in Calatayud et al. (2016b).

840

841 **Figure 3**

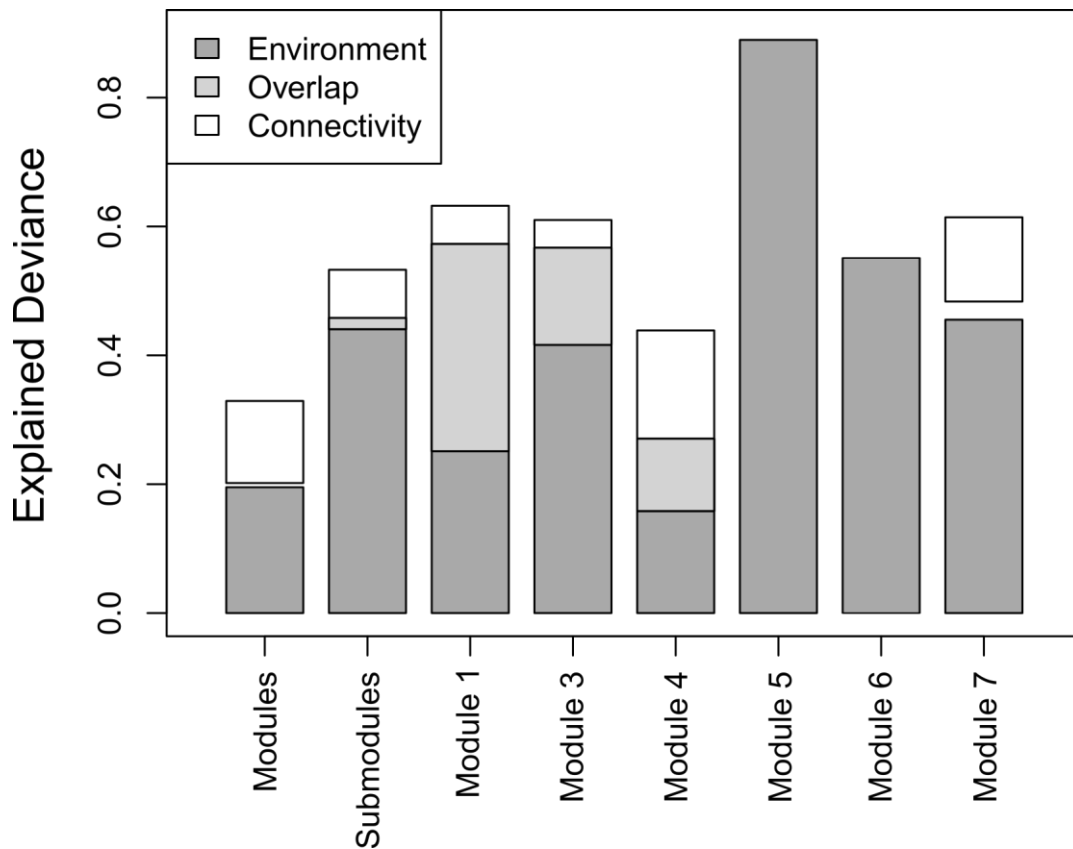

842

843 **Figure 3.** Results of the partial generalized matrix regression of similarity in regional  
844 co-occurrence, as a function of environmental niche similarity (climate and habitat),  
845 topographical connectivity and phylogenetic distances. The first and second bars  
846 correspond with the models including co-occurrence similarities among all modules and  
847 submodules, respectively. The remaining bars correspond with the models where the  
848 similarities in submodule occurrence were analysed independently for the species of  
849 each module.

850 **Figure 4**

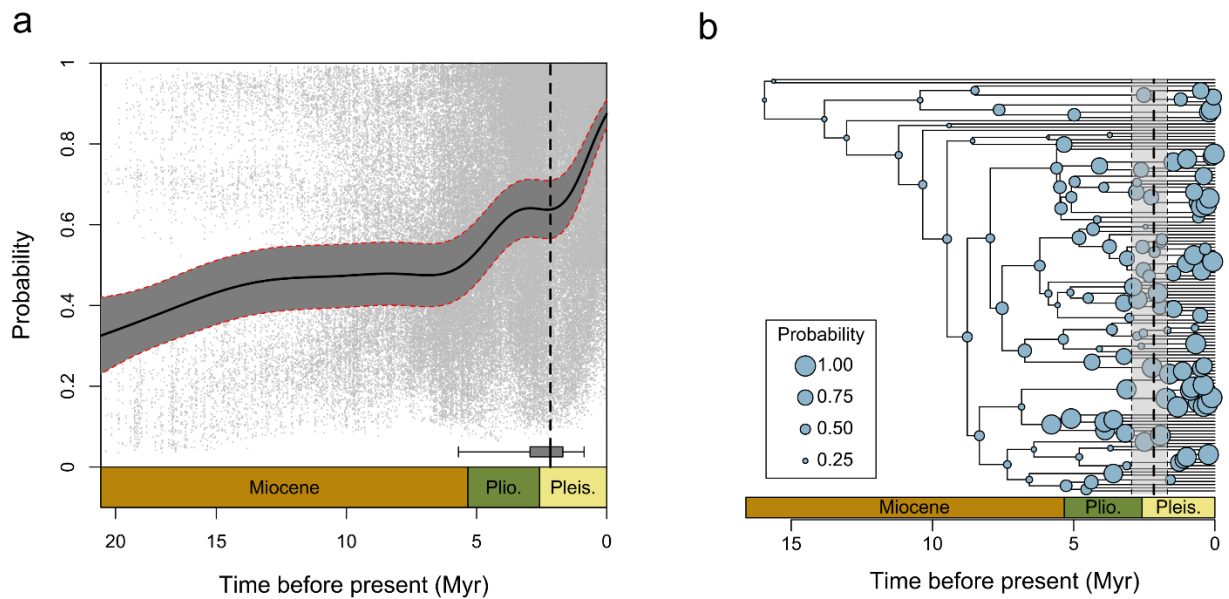

851

852 **Figure 4.** Results of the ancestral range estimation. a) GAMM predictions of the  
853 marginal probability as a function of node age for the BAREALIKE+J model. The  
854 shaded area corresponds with the interval confidence at 95%. The dotted black line  
855 represents the median of the breakpoint found by piecewise GLM regressions. The  
856 boxplot at the bottom represent the 45<sup>th</sup> and 55<sup>th</sup> percentile breakpoint values, whereas  
857 the whiskers depict the 25<sup>th</sup> and 75<sup>th</sup> percentiles. b) An example of a phylogenetic  
858 hypothesis where the BAREALIKE+J model was the best supported by the data. The  
859 size of the internal phylogenetic nodes is proportional to the marginal probability of the  
860 most probable state. The dotted line corresponds with the average breakpoint (median)  
861 in the relationship between node age and marginal probability. The shaded area depicts  
862 the 45<sup>th</sup> and 55<sup>th</sup> percentiles.
